# Supplementary material for: Self-assembled DNA tetrahedral optofluidic lasers with precise and tunable gain control
Source: Royal Society of Chemistry journal article supplement (doi:10.1039/c3lc50629k), 2013-01-01
Supplement: c3lc50629k.pdf [file c3lc50629k.pdf]

## Supplementary information

# Self-assembled DNA Tetrahedral Optofluidic Lasers with Precise and Tunable Gain Control

Qiushu Chen,<sup>1,#</sup> Huajie Liu,<sup>2,#</sup> Wonsuk Lee,<sup>1,3,#</sup> Yuze Sun,<sup>1</sup> Dan Zhu,<sup>2</sup> Hao Pei,<sup>2</sup>

Chunhai Fan,<sup>2,\*</sup> and Xudong Fan<sup>1,\*</sup>

<sup>1</sup>*Department of Biomedical Engineering, University of Michigan, 1101 Beal Ave.,*

*Ann Arbor, MI 48109, United States*

<sup>2</sup>*Division of Physical Biology, and Bioimaging Center, Shanghai Synchrotron Radiation Facility,*

*Shanghai Institute of Applied Physics, Chinese Academy of Sciences,*

*Shanghai 201800, China*

<sup>3</sup>*Department of Electrical Engineering and Computer Science, University of Michigan,*

*1301 Beal Avenue, Ann Arbor, MI 48109, United States*

*<sup>#</sup>Equal contribution*

*<sup>\*</sup>fchh@sinap.ac.cn*

*<sup>\*</sup>xsfan@umich.edu*

| Name | Sequence (5'-3')                     |
|------|--------------------------------------|
| LA1  | cy3-TAAGTCTGAAAATTACAGCTTACGCCATAGTA |
| LA2  | cy5-TAAGTCTGAAAATTACAGCTTACGCCATAGTA |
| LB   | cy5-TATCACCAGGAAAGCTGTAATAGGTCCAATAC |
| LC   | cy3-CCTGGTGATAATACGTGGGAAATACTATGGCG |
| LD1  | cy3-TTCAGACTTAATTCCCACGTAAGTATTGGACC |
| LD2  | cy5-TTCAGACTTAATTCCCACGTAAGTATTGGACC |

**Table S1.** DNA strands used in the experiment. LA2, LB, LC, LD2 are for 1Cy3-3Cy5, the left tetrahedron in Fig. 1(A). LA1, LB, LC, LD1 are for 3Cy3-1Cy5, the right tetrahedron in Fig. 1(A).

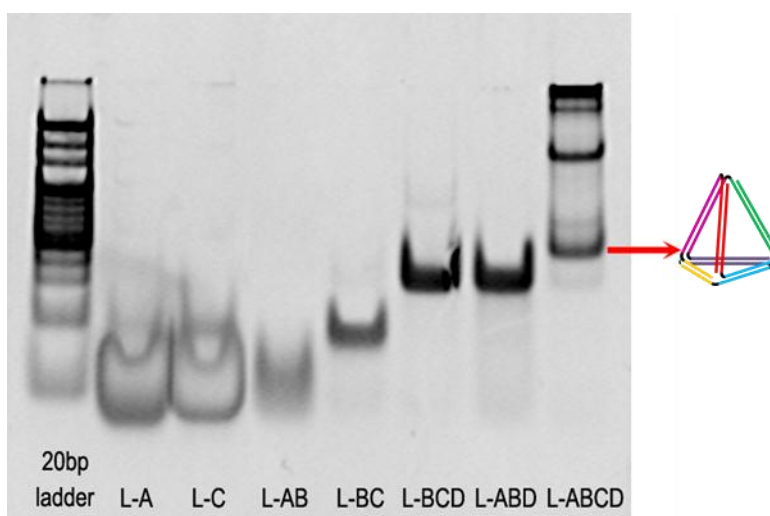

**Figure S1.** Purification of the DNA tetrahedra with native PAGE gel. The band with the red arrow corresponds to the formed DNA tetrahedra.
